# Supplementary material for: MicroRNA Classifier and Nomogram for Metastasis Prediction in Colon Cancer
Source: Oxford University Press journal article supplement (doi:10.1158/1055-9965.epi-14-0544-t), 2014-10-14
Supplement: 10559965epi140544t-sup-131731_2_supp_2695181_nd6gd5.doc [file 10559965epi140544t-sup-131731_2_supp_2695181_nd6gd5.doc]

**Supplementary File S5.** Associations of miRNA expression with clinicopathological parameters

Shown are data from associations of the individual or combined relative miRNA expression with clinicopathological parameters, separated in the discovery- and validation patient cohort. Significant associations are indicated in bold. Abbreviations: N= number of patients, p= p-value
