# Supplementary material for: MicroRNA Classifier and Nomogram for Metastasis Prediction in Colon Cancer
Source: Oxford University Press journal article supplement (doi:10.1158/1055-9965.epi-14-0544-t), 2014-10-14
Supplement: 10559965epi140544t-sup-131731_2_supp_2695183_nd6gd5.doc [file 10559965epi140544t-sup-131731_2_supp_2695183_nd6gd5.doc]

**Supplementary File S7.** Predicted target genes

**S7a**. Predicted target gene overlap between prediction databases

Different established online miRNA target (prediction) tools/databases were consulted. Each circle represents one of the miRNA target (prediction) databases, indicated by numbers in **bold**:

1= TargetScan predicted http://www.targetscan.org/

2= DIANA-microT-CDS predicted http://diana.imis.athena-innovation.gr/DianaTools/ index.php?r=microT_CDS/index

3= miRDB predicted http://mirdb.org/miRDB/

4= miRTarBase validated http://mirtarbase.mbc.nctu.edu.tw/

Other numbers indicate the amount of target genes identified by databases TargetScanHuman release 6.2 (**1**), DIANA-microT-CDS release v5.0 (**2**), miRDB (**3**) and miRTarBase release 4.5 (**4**). Numbers in parentheses give the amount of predicted target genes that were actually validated according to miRTarBase (**4**). The overlapping predicted targets are listed per miRNA.

Expression of both miR-25-3p and miR-339-5p was lower in patients with metachronous distant metastases compared to patients with non-metastasized tumors, an increased expression of the target gene(s) was hypothesized to be involved in cancer (metastasis). The putative target genes, per miRNA, that were predicted by all three databases are listed below, including their published interactions with miR-25 or miR-339.

List of putative target genes of miR-25 predicted by all three databases, including their published interactions with miR-25.

| **miR-25-3p** (N=38) | |
| --- | --- |
| gene name | validated interaction result |
| ADCY3 | no |
| ADM | no |
| AP1AR | no |
| ATRX | no |
| BAHCC1 | no |
| CCNC | no |
| CHST1 | no |
| CLDN11 | no |
| COL1A2 | no |
| DMXL1 | no |
| DNAJB12 | no |
| EGR2 | no |
| EXOC5 | no |
| GOLGA4 | no |
| HIPK3 | no |
| LATS2 | no |
| LHFPL2 | no |
| LMO2 | no |
| LRRC8B | no |
| MAP2K4 | yes (1); role dependent on cellular setting: metastatic suppressor activity (2) and pro-oncogenic properties (1, 3, 4) |
| MIER3 | no |
| NKX2-3 | no |
| NLK | no |
| PCDH11X | no |
| PCDH11Y | no |
| PGAM1 | no |
| PHTF2 | no |
| PPCS | no |
| PRDM13 | no |
| REV3L | yes (5); high expression → resistance to chemotherapy (6, 7) |
| RNF4 | no |
| RNF44 | no |
| SH3PXD2A | no |
| TGIF1 | no |
| TMEM87A | no |
| TOB1 | no |
| TOB2 | no |
| ZNF287 | no |

List of putative target genes of miR-339 predicted by all three databases, including their published interactions with miR-339.

| **miR-339-5p** (N=36) | |
| --- | --- |
| gene name | validated interaction result |
| ALKBH1 | no |
| ANKRD52 | yes (8) |
| ARHGAP36 | no |
| BCL6 | yes (9); high expression → increased cancer cell growth (9), tumor progression (10),  higher metastasis rates (9) and lower patient survival (9) |
| C1QTNF2 | no |
| C6orf223 | no |
| CDK14 | no |
| CNNM4 | no |
| CNOT6 | no |
| CYTH1 | no |
| EMILIN2 | no |
| KLF11 | no |
| LHX6 | no |
| LSM14B | no |
| MAPRE1 | no |
| MLL (KMT2A) | no |
| MYO1C | no |
| NFIB | no |
| NOVA1 | no |
| NRXN1 | no |
| PDZD4 | no |
| PGRMC2 | no |
| PLEKHH1 | no |
| SLC4A10 | no |
| SNX27 | no |
| SYT2 | no |
| TMEM183A | no |
| UBE3A | no |
| UBN2 | no |
| UNC5C | no |
| USP8 | no |
| VCP | no |
| ZDHHC22 | no |
| ZNF275 | no |
| ZNF385B | no |
| ZNF689 | no |

**S7b**. Gene Ontology-term enrichment

GO-term enrichment for miR-25-3p overlapping predicted targets (N=38) using on-line functional annotation tool DAVID release v6.7 (http://david.abcc.ncifcrf.gov/home.jsp):

| Term | Count | % |
| --- | --- | --- |
| GO:0005488~binding | 31 | 82 |
| GO:0009987~cellular process | 28 | 74 |
| GO:0065007~biological regulation | 22 | 58 |
| GO:0050794~regulation of cellular process | 21 | 55 |
| GO:0050789~regulation of biological process | 21 | 55 |
| GO:0044237~cellular metabolic process | 20 | 53 |
| GO:0044238~primary metabolic process | 20 | 53 |
| GO:0019222~regulation of metabolic process | 16 | 42 |
| GO:0006807~nitrogen compound metabolic process | 16 | 42 |
| GO:0005634~nucleus | 16 | 42 |
| GO:0044260~cellular macromolecule metabolic process | 16 | 42 |
| GO:0006139~nucleobase, nucleoside, nucleotide and nucleic acid metabolic process | 15 | 39 |
| GO:0031323~regulation of cellular metabolic process | 15 | 39 |
| GO:0034641~cellular nitrogen compound metabolic process | 15 | 39 |
| GO:0019219~regulation of nucleobase, nucleoside, nucleotide and nucleic acid metabolic process | 14 | 37 |
| GO:0051171~regulation of nitrogen compound metabolic process | 14 | 37 |
| GO:0060255~regulation of macromolecule metabolic process | 14 | 37 |
| GO:0080090~regulation of primary metabolic process | 14 | 37 |
| GO:0044249~cellular biosynthetic process | 14 | 37 |
| GO:0009058~biosynthetic process | 14 | 37 |
| GO:0010468~regulation of gene expression | 13 | 34 |
| GO:0031326~regulation of cellular biosynthetic process | 13 | 34 |
| GO:0009889~regulation of biosynthetic process | 13 | 34 |
| GO:0003677~DNA binding | 12 | 32 |
| GO:0045449~regulation of transcription | 12 | 32 |
| GO:0034645~cellular macromolecule biosynthetic process | 12 | 32 |
| GO:0010556~regulation of macromolecule biosynthetic process | 12 | 32 |
| GO:0009059~macromolecule biosynthetic process | 12 | 32 |
| GO:0003676~nucleic acid binding | 12 | 32 |
| GO:0006350~transcription | 11 | 29 |
| GO:0010467~gene expression | 11 | 29 |
| GO:0048523~negative regulation of cellular process | 8 | 21 |
| GO:0048519~negative regulation of biological process | 8 | 21 |
| GO:0051239~regulation of multicellular organismal process | 7 | 18 |
| GO:0007242~intracellular signaling cascade | 7 | 18 |
| GO:0051716~cellular response to stimulus | 6 | 16 |
| GO:0007399~nervous system development | 6 | 16 |
| GO:0008134~transcription factor binding | 5 | 13 |
| GO:0050793~regulation of developmental process | 5 | 13 |
| GO:0042127~regulation of cell proliferation | 5 | 13 |
| GO:0008285~negative regulation of cell proliferation | 4 | 11 |
| GO:0009725~response to hormone stimulus | 4 | 11 |
| GO:0009719~response to endogenous stimulus | 4 | 11 |
| GO:0004674~protein serine/threonine kinase activity | 4 | 11 |
| GO:0045595~regulation of cell differentiation | 4 | 11 |
| GO:0030278~regulation of ossification | 3 | 8 |
| GO:0007178~transmembrane receptor protein serine/threonine kinase signaling pathway | 3 | 8 |
| GO:0048729~tissue morphogenesis | 3 | 8 |
| GO:0045596~negative regulation of cell differentiation | 3 | 8 |
| GO:0009968~negative regulation of signal transduction | 3 | 8 |
| GO:0010648~negative regulation of cell communication | 3 | 8 |
| GO:0006171~cAMP biosynthetic process | 2 | 5 |
| GO:0018107~peptidyl-threonine phosphorylation | 2 | 5 |
| GO:0046058~cAMP metabolic process | 2 | 5 |
| GO:0018210~peptidyl-threonine modification | 2 | 5 |
| GO:0009190~cyclic nucleotide biosynthetic process | 2 | 5 |
| GO:0018105~peptidyl-serine phosphorylation | 2 | 5 |
| GO:0045638~negative regulation of myeloid cell differentiation | 2 | 5 |
| GO:0009187~cyclic nucleotide metabolic process | 2 | 5 |
| GO:0018209~peptidyl-serine modification | 2 | 5 |
| GO:0008366~axon ensheathment | 2 | 5 |
| GO:0007272~ensheathment of neurons | 2 | 5 |
| GO:0046332~SMAD binding | 2 | 5 |

GO-term enrichment for miR-339-5p overlapping predicted targets (N=36) using on-line functional annotation tool DAVID release v6.7 (http://david.abcc.ncifcrf.gov/home.jsp):

| Term | Count | % |
| --- | --- | --- |
| GO:0005488~binding | 29 | 81 |
| GO:0005515~protein binding | 21 | 58 |
| GO:0044260~cellular macromolecule metabolic process | 15 | 42 |
| GO:0005634~nucleus | 15 | 42 |
| GO:0043170~macromolecule metabolic process | 15 | 42 |
| GO:0046872~metal ion binding | 13 | 36 |
| GO:0043169~cation binding | 13 | 36 |
| GO:0043167~ion binding | 13 | 36 |
| GO:0006139~nucleobase, nucleoside, nucleotide and nucleic acid metabolic process | 11 | 31 |
| GO:0034641~cellular nitrogen compound metabolic process | 11 | 31 |
| GO:0006350~transcription | 8 | 22 |
| GO:0048513~organ development | 7 | 19 |
| GO:0006355~regulation of transcription, DNA-dependent | 7 | 19 |
| GO:0051252~regulation of RNA metabolic process | 7 | 19 |
| GO:0005730~nucleolus | 5 | 14 |
| GO:0007420~brain development | 4 | 11 |
| GO:0008285~negative regulation of cell proliferation | 4 | 11 |
| GO:0007417~central nervous system development | 4 | 11 |
| GO:0008289~lipid binding | 4 | 11 |
| GO:0006259~DNA metabolic process | 4 | 11 |
| GO:0006915~apoptosis | 4 | 11 |
| GO:0012501~programmed cell death | 4 | 11 |
| GO:0006511~ubiquitin-dependent protein catabolic process | 3 | 8 |

**S7c**. Common target genes for miR-25 and miR-339

|  | miR-25 | | miR-339 | |
| --- | --- | --- | --- | --- |
| Target gene | predicted by | validated | predicted by | validated |
| Predicted by two overlapping databases | | | | |
| CASK | TargetScan/DIANA | no | TargetScan/DIANA | no |
| EDEM1 | DIANA/mirDB | no | DIANA/mirDB | no |
| METTL7A | DIANA/mirDB | no | DIANA/mirDB | no |
| NFIB | TargetScan/DIANA | no | all three | no |
| NOVA1 | DIANA/mirDB | no | all three | no |
| SLC4A10 | DIANA/mirDB | no | all three | no |
| Predicted by two databases, from which one overlapping | | | | |
| BAZ2B | DIANA/mirDB | no | TargetScan/DIANA | no |
| DDX3X | DIANA/mirDB | no | TargetScan/DIANA | no |
| JOSD1 | DIANA/mirDB | no | TargetScan/DIANA | no |
| PTPRD | DIANA/mirDB | no | TargetScan/DIANA | no |
| Predicted by one overlapping database | | | | |
| AATK | DIANA/mirDB | no | DIANA | no |
| ACOX1 | DIANA/mirDB | no | mirDB | no |
| ANKIB1 | DIANA/mirDB | yes (8) | DIANA | no |
| ATXN1 | TargetScan/DIANA | no | DIANA | no |
| CNNM4 | DIANA | no | all three | no |
| COL11A1 | DIANA/mirDB | no | DIANA | no |
| COL12A1 | DIANA/mirDB | no | DIANA | no |
| DNAJC21 | DIANA | no | TargetScan/DIANA | no |
| DOCK5 | TargetScan/DIANA | no | DIANA | no |
| FAM150B | DIANA/mirDB | no | DIANA | no |
| FAM196A | DIANA | no | TargetScan/DIANA | no |
| FHL2 | DIANA/mirDB | no | DIANA | no |
| KIF1B | DIANA | no | TargetScan/DIANA | no |
| KLHL29 | DIANA/mirDB | no | DIANA | no |
| MYT1L | TargetScan/DIANA | no | TargetScan | no |
| ONECUT2 | DIANA | no | TargetScan/DIANA | no |
| PAFAH1B1 | DIANA/mirDB | no | mirDB | no |
| RGL1 | DIANA | no | TargetScan/DIANA | no |
| RNF180 | DIANA | no | DIANA/mirDB | no |
| RUNX1T1 | TargetScan/DIANA | no | TargetScan | no |
| SCARB2 | DIANA | no | DIANA/mirDB | no |
| SFMBT2 | DIANA/mirDB | no | mirDB | no |
| SYT2 | TargetScan | no | all three | no |
| TIA1 | TargetScan/DIANA | no | DIANA | no |
| TOR1AIP2 | DIANA | no | DIANA/mirDB | no |
| UBE2Z | DIANA | no | TargetScan/DIANA | no |
| XYLT2 | TargetScan/DIANA | no | DIANA | no |
| Predicted by the same database | | | | |
| ACAN | TargetScan | no | TargetScan | no |
| C18orf1 | DIANA | no | DIANA | no |
| CDK16 | DIANA | no | DIANA | no |
| CENPP | DIANA | no | DIANA | no |
| CPLX2 | TargetScan | no | TargetScan | no |
| FIGN | DIANA | no | DIANA | no |
| FREM2 | mirDB | no | mirDB | no |
| INSL4 | DIANA | no | DIANA | no |
| ITCH | DIANA | no | DIANA | no |
| LANCL3 | DIANA | no | DIANA | no |
| LRP1B | DIANA | no | DIANA | no |
| MAST4 | DIANA | no | DIANA | no |
| PAPOLA | DIANA | no | DIANA | no |
| PDE8A | DIANA | no | DIANA | no |
| PIK3CB | DIANA | no | DIANA | no |
| PLGLB1 | mirDB | no | mirDB | no |
| PLGLB2 | mirDB | no | mirDB | no |
| PPARGC1B | TargetScan | no | TargetScan | no |
| PRAMEF1 | mirDB | no | mirDB | no |
| RBM27 | DIANA | yes (8) | DIANA | no |
| RFX1 | DIANA | no | DIANA | no |
| SCD5 | mirDB | no | mirDB | no |
| SLC16A14 | DIANA | no | DIANA | no |
| TPMT | mirDB | no | mirDB | no |
| TTC26 | DIANA | no | DIANA | no |
| USF2 | TargetScan | no | TargetScan | yes (8)* |
| ZNF595 | mirDB | no | mirDB | no |
| ZNF726 | DIANA | no | DIANA | no |
| ZNF805 | DIANA | no | DIANA | no |

Presented is the list of 66 target genes that are predicted for both miR-25 and miR-339 by the same database(s). From those genes with validated (see column) miRNA interaction, USF2 was previously described to be involved in carcinogenesis. Depending on the cellular context, loss of function (11) or increased expression (12) resulted in increased proliferation of tumor cells. USF2 was furthermore shown to bind and activate the promoter of adenomatous polyposis coli (APC) tumor suppressor gene (13).

Reference List

1 Marasa BS, Srikantan S, Masuda K, Abdelmohsen K, Kuwano Y, Yang X, et al. Increased MKK4 abundance with replicative senescence is linked to the joint reduction of multiple microRNAs. Sci Signal 2009;2:ra69.

2 Teng DH, Perry WL, III, Hogan JK, Baumgard M, Bell R, Berry S, et al. Human mitogen-activated protein kinase kinase 4 as a candidate tumor suppressor. Cancer Res 1997;57:4177-82.

3 Finegan KG, Tournier C. The mitogen-activated protein kinase kinase 4 has a pro-oncogenic role in skin cancer. Cancer Res 2010;70:5797-806.

4 Kennedy NJ, Davis RJ. Role of JNK in tumor development. Cell Cycle 2003;2:199-201.

5 Lange SS, Bedford E, Reh S, Wittschieben JP, Carbajal S, Kusewitt DF, et al. Dual role for mammalian DNA polymerase zeta in maintaining genome stability and proliferative responses. Proc Natl Acad Sci U S A 2013;110:E687-E696.

6 Shi TY, Yang L, Yang G, Tu XY, Wu X, Cheng X, et al. DNA polymerase zeta as a potential biomarker of chemoradiation resistance and poor prognosis for cervical cancer. Med Oncol 2013;30:500.

7 Wang H, Zhang SY, Wang S, Lu J, Wu W, Weng L, et al. REV3L confers chemoresistance to cisplatin in human gliomas: the potential of its RNAi for synergistic therapy. Neuro Oncol 2009;11:790-802.

8 Helwak A, Kudla G, Dudnakova T, Tollervey D. Mapping the human miRNA interactome by CLASH reveals frequent noncanonical binding. Cell 2013;153:654-65.

9 Wu ZS, Wu Q, Wang CQ, Wang XN, Wang Y, Zhao JJ, et al. MiR-339-5p inhibits breast cancer cell migration and invasion in vitro and may be a potential biomarker for breast cancer prognosis. BMC Cancer 2010;10:542.

10 Sena P, Mariani F, Benincasa M, De Leon MP, Di GC, Mancini S, et al. Morphological and quantitative analysis of BCL6 expression in human colorectal carcinogenesis. Oncol Rep 2014;31:103-10.

11 Ismail PM, Lu T, Sawadogo M. Loss of USF transcriptional activity in breast cancer cell lines. Oncogene 1999;18:5582-91.

12 Agirre X, Jimenez-Velasco A, San Jose-Eneriz E, Garate L, Bandres E, Cordeu L, et al. Down-regulation of hsa-miR-10a in chronic myeloid leukemia CD34+ cells increases USF2-mediated cell growth. Mol Cancer Res 2008;6:1830-40.

13 Jaiswal AS, Narayan S. Upstream stimulating factor-1 (USF1) and USF2 bind to and activate the promoter of the adenomatous polyposis coli (APC) tumor suppressor gene. J Cell Biochem 2001;81:262-77.
